# Supplementary material
Source: publisher figshare collection journal article supplement (https://frontiersin.figshare.com/ndownloader/files/18791498)
Supplement: Supplementary file [file 18791498]

## Supplementary material

Table S1. Results for mixed effects model for factors predicting the maximum deviation of the mouse trajectory in the verb bias task by all child participants, with a dataset that included a continuous variable of bias strength, a categorical variable for consistency of choice, and performance on the first half of the statistical learning task.

| Factor                                                                                 | Variance | SD  | <i>B</i> | <i>SE</i> | <i>p</i>   |
|----------------------------------------------------------------------------------------|----------|-----|----------|-----------|------------|
| Random Factors                                                                         |          |     |          |           |            |
| Subject                                                                                | .01      | .09 |          |           |            |
| Fixed Factors                                                                          |          |     |          |           |            |
| (Intercept)                                                                            |          |     | -.07     | .12       | .57        |
| Artificial grammar learning performance<br>(novel – ungrammatical, first half of test) |          |     | .33      | .24       | .17        |
| Strength, measured continuously                                                        |          |     | .0002    | .003      | .96        |
| Consistency of choice with verb bias<br>(consistent=reference variable)                |          |     | .87      | .32       | .01        |
| Artificial grammar learning x strength                                                 |          |     | -0.01    | .007      | .14        |
| Artificial grammar learning x consistency                                              |          |     | -1.14    | .72       | .11        |
| Consistency x strength                                                                 |          |     | -0.02    | .009      | .02        |
| Artificial grammar learning x strength x consistency                                   |          |     | .03      | .02       | <b>.09</b> |

Table S2. Results for mixed effects model for factors predicting the maximum deviation of the mouse trajectory in the verb bias task by typically developing child participants, with a dataset that included a continuous variable of bias strength, a categorical variable for consistency of choice, and performance on the first half of the statistical learning task.

| Factor                                                                                 | Variance | SD  | <i>B</i> | <i>SE</i> | <i>p</i>   |
|----------------------------------------------------------------------------------------|----------|-----|----------|-----------|------------|
| Random Factors                                                                         |          |     |          |           |            |
| Subject                                                                                | .01      | .09 |          |           |            |
| Fixed Factors                                                                          |          |     |          |           |            |
| (Intercept)                                                                            |          |     | -.009    | .13       | .94        |
| Artificial grammar learning performance<br>(novel – ungrammatical, first half of test) |          |     | .34      | .25       | .18        |
| Strength, measured continuously                                                        |          |     | .002     | .004      | .60        |
| Consistency of choice with verb bias<br>(consistent=reference variable)                |          |     | .69      | .35       | .051       |
| Artificial grammar learning x strength                                                 |          |     | -0.01    | .01       | .18        |
| Artificial grammar learning x consistency                                              |          |     | -1.39    | .74       | .06        |
| Consistency x strength                                                                 |          |     | -0.02    | .01       | .08        |
| Artificial grammar learning x strength x consistency                                   |          |     | .04      | .02       | <b>.07</b> |

Table S3. Results for mixed effects logistic regression of factors predicting the probability of a choice consistent with bias in the verb bias task by typically developing adult participants, with a dataset that included only strongly-biased verbs.

| Factor                                                                          | Variance | SD  | <i>B</i> | <i>SE</i> | <i>p</i>   |
|---------------------------------------------------------------------------------|----------|-----|----------|-----------|------------|
| Random Factors                                                                  |          |     |          |           |            |
| Subject                                                                         | .00      | .00 |          |           |            |
| Fixed Factors                                                                   |          |     |          |           |            |
| (Intercept)                                                                     |          |     | .74      | .12       | <.0001     |
| Artificial grammar learning performance<br>(novel – ungrammatical, entire test) |          |     | .20      | .11       | <b>.07</b> |

Table S4. Results for mixed effects logistic regression of factors predicting the probability of a choice consistent with bias in the verb bias task by typically developing adult participants, with a dataset that included a continuous variable of bias strength.

| Factor                                                                          | Variance | SD  | <i>B</i> | <i>SE</i> | <i>p</i>    |
|---------------------------------------------------------------------------------|----------|-----|----------|-----------|-------------|
| Random Factors                                                                  |          |     |          |           |             |
| Subject                                                                         | .00      | .00 |          |           |             |
| Fixed Factors                                                                   |          |     |          |           |             |
| (Intercept)                                                                     |          |     | -.40     | .24       | .09         |
| Artificial grammar learning performance<br>(novel – ungrammatical, entire test) |          |     | -.35     | .22       | .1          |
| Strength, measured continuously                                                 |          |     | .03      | .007      | <.0001      |
| Artificial grammar learning x strength                                          |          |     | .01      | .006      | <b>.058</b> |
